# Supplementary material for: Association of Vitamin D Status and Other Clinical Characteristics With COVID-19 Test Results
Source: PubMed Central journal article supplement (PMC7489852; doi:10.1001/jamanetworkopen.2020.19722), 2020-09-03
Supplement: jamanetwopen-e2019722-s001.pdf [file jamanetwopen-e2019722-s001.pdf]

## Supplementary Online Content

Meltzer DO, Best TJ, Zhang H, Vokes T, Arora V, Solway J. Association of vitamin D status and other clinical characteristics with COVID-19 test results. *JAMA Netw Open*. 2020;3(9):e2019722. doi:10.1001/jamanetworkopen.2020.19722

### **eAppendix.** Methods

**eTable 1.** Characteristics of Patient Population

**eTable 2.** Bivariate Analysis of Most Recent Active Vitamin D Treatment 14 Days Before COVID-19 Test Order and COVID-19 Test Results, Among Patients With Most Recent Vitamin D in Past Year <20 ng/mL

### **eReference**

This supplementary material has been provided by the authors to give readers additional information about their work.

## eAppendix. Methods

*Chronic condition indicators.* Each chronic condition indicator was set equal to 1 if the patient had at least one of a list of ICD-10-CM diagnosis codes included on an administrative/billing record with a discharge date between January 1, 2018 and April 10, 2020. The lists of codes used for the indicators was defined using the HCUP Elixhauser Comorbidity Software.<sup>1</sup> For each condition, we used all ICD-10-CM and DRG codes listed within categories in the Elixhauser file `comformat_icd10_cm_2020_1.sas`, entitled Creation of Format Library for Comorbidity Groups, ICD-10-CM Elixhauser Comorbidity Software, Version 2020.1. The actual ICD-10-CM codes can be found by finding the following category variable names in the file. Hypertension: HTN, HHRWCHF, HHRWHRF, HHRWOHRF, HHRWRF, HRENWOLF, HRENWRF, HTNCX, HTNPREG, HTNWCHF, HTNWOCHF, OHTNPREG, HTNCXDRG, HTNDRG. Diabetes: DM, DMCX, DIABDRG. Chronic pulmonary disease: CHRNLUNG, PULMDRG. Pulmonary circulation disorders: PULMCIRC. Depression: DEPRESS. CKD: RENLFAIL, HHRWCHF, HHRWHRF, HHRWOHRF, HHRWRF, HRENWOLF, RENALDRG, RENFDRG. Liver disease: LIVER. CM\_IS: AIDS, METS, TUMOR, ARTH.

| eTable 1: Characteristics of Patient Population             |                |     |                               |     |                                                        |     |                                                        |     |                                |     |                                    |
|-------------------------------------------------------------|----------------|-----|-------------------------------|-----|--------------------------------------------------------|-----|--------------------------------------------------------|-----|--------------------------------|-----|------------------------------------|
|                                                             | Full sample    |     | Likely deficient <sup>a</sup> |     | Uncertain deficiency: increased treatment <sup>b</sup> |     | Uncertain deficiency: decreased treatment <sup>c</sup> |     | Likely sufficient <sup>d</sup> |     | Fisher's exact test for difference |
|                                                             | N              | %   | N                             | %   | N                                                      | %   | N                                                      | %   | N                              | %   | p-value                            |
| Number of patients                                          | 489            | 100 | 124                           | 100 | 48                                                     | 100 | 30                                                     | 100 | 287                            | 100 |                                    |
| Age                                                         |                |     |                               |     |                                                        |     |                                                        |     |                                |     |                                    |
| years, mean (SD)                                            | 49.2<br>(18.4) |     | 46.0<br>(18.1)                |     | 45.8<br>(16.4)                                         |     | 50.2<br>(20.0)                                         |     | 51.1<br>(18.5)                 |     | 0.04 (ANOVA)                       |
| <50                                                         | 260            | 53  | 77                            | 62  | 32                                                     | 67  | 10                                                     | 33  | 141                            | 49  | 0.01                               |
| 50-64                                                       | 122            | 25  | 25                            | 20  | 8                                                      | 17  | 14                                                     | 47  | 75                             | 26  |                                    |
| 65+                                                         | 107            | 22  | 22                            | 18  | 8                                                      | 17  | 6                                                      | 20  | 71                             | 25  |                                    |
| Gender                                                      |                |     |                               |     |                                                        |     |                                                        |     |                                |     | 0.27                               |
| Female                                                      | 366            | 75  | 93                            | 75  | 40                                                     | 83  | 19                                                     | 63  | 214                            | 75  |                                    |
| Male                                                        | 123            | 25  | 31                            | 25  | 8                                                      | 17  | 11                                                     | 37  | 73                             | 25  |                                    |
| Race                                                        |                |     |                               |     |                                                        |     |                                                        |     |                                |     | <0.001                             |
| White                                                       | 158            | 32  | 22                            | 18  | 8                                                      | 17  | 8                                                      | 27  | 120                            | 42  | <0.001                             |
| Other than White                                            | 331            | 68  | 102                           | 82  | 40                                                     | 83  | 22                                                     | 73  | 167                            | 58  |                                    |
| Ethnicity                                                   |                |     |                               |     |                                                        |     |                                                        |     |                                |     | 0.53                               |
| Hispanic                                                    | 41             | 8   | 8                             | 6   | 6                                                      | 13  | <5                                                     |     | 24                             | 8   |                                    |
| Not Hispanic                                                | 448            | 92  | 116                           | 94  | 42                                                     | 88  | 27                                                     | 90  | 263                            | 92  |                                    |
| Employee status                                             |                |     |                               |     |                                                        |     |                                                        |     |                                |     | 0.007                              |
| UChicago employee                                           | 161            | 33  | 41                            | 33  | 18                                                     | 38  | <5                                                     |     | 100                            | 35  |                                    |
| Not UChicago employee                                       | 328            | 67  | 83                            | 67  | 30                                                     | 63  | 28                                                     | 93  | 187                            | 65  |                                    |
| Vitamin D level evaluated in past year                      | 489            | 100 | 124                           | 100 | 48                                                     | 100 | 30                                                     | 100 | 287                            | 100 |                                    |
| Most recent vitamin D<20 ng/ml                              | 172            | 35  | 124                           | 100 | 48                                                     | 100 | 0                                                      | 0   | 0                              | 0   |                                    |
| Days since most recent vitamin D level (mean)               | 162            |     | 149                           |     | 174                                                    |     | 134                                                    |     | 169                            |     | 0.09 (ANOVA)                       |
| Days since most recent vitamin D level (median)             | 151            |     | 117                           |     | 165                                                    |     | 112                                                    |     | 161                            |     | 0.04                               |
| Comorbidity indicators                                      |                |     |                               |     |                                                        |     |                                                        |     |                                |     |                                    |
| Hypertension                                                | 261            | 53  | 65                            | 52  | 24                                                     | 50  | 21                                                     | 70  | 151                            | 53  | 0.30                               |
| Diabetes                                                    | 137            | 28  | 30                            | 24  | 21                                                     | 44  | 11                                                     | 37  | 75                             | 26  | 0.04                               |
| Chronic pulmonary disease                                   | 117            | 24  | 34                            | 27  | 9                                                      | 18  | 8                                                      | 27  | 66                             | 23  | 0.62                               |
| Pulmonary circulation disorders                             | 20             | 4   | 6                             | 5   | <5                                                     |     | <5                                                     |     | 10                             | 3   | 0.67                               |
| Depression                                                  | 119            | 24  | 37                            | 30  | 8                                                      | 17  | 11                                                     | 37  | 63                             | 22  | 0.08                               |
| Chronic kidney disease                                      | 116            | 24  | 27                            | 22  | 9                                                      | 18  | 12                                                     | 40  | 68                             | 24  | 0.17                               |
| Liver disease                                               | 56             | 11  | 13                            | 10  | <5                                                     |     | 8                                                      | 27  | 31                             | 11  | 0.09                               |
| Comorbidities with immunosuppression                        | 105            | 21  | 28                            | 23  | 8                                                      | 17  | 7                                                      | 23  | 62                             | 22  | 0.85                               |
| BMI (mean)                                                  | 29.8           |     | 30.0                          |     | 31.5                                                   |     | 28.8                                                   |     | 29.5                           |     | 0.40 (ANOVA)                       |
| BMI ≥30 kg/m <sup>2</sup>                                   | 229            | 47  | 58                            | 47  | 30                                                     | 63  | 12                                                     | 40  | 129                            | 45  | 0.13                               |
| Most recent active vitamin D treatment before COVID-19 test |                |     |                               |     |                                                        |     |                                                        |     |                                |     | <0.001                             |
| None                                                        | 212            | 43  | 70                            | 56  | 10                                                     | 21  | 8                                                      | 27  | 124                            | 43  | <0.001                             |
| 1-1000 IU D3/Multivitamin                                   | 113            | 23  | 18                            | 15  | 10                                                     | 21  | 15                                                     | 50  | 70                             | 24  | 0.001                              |
| 2000 IU D3                                                  | 60             | 12  | <5                            |     | <5                                                     |     | <5                                                     |     | 52                             | 18  | <0.001                             |
| 3000+ IU D3                                                 | 20             | 4   | <5                            |     | 7                                                      | 15  | <5                                                     |     | 8                              | 3   | 0.004                              |
| D2                                                          | 76             | 16  | 27                            | 22  | 17                                                     | 35  | <5                                                     |     | 28                             | 10  | <0.001                             |
| Calcitriol                                                  | 8              | 2   | <5                            |     | 0                                                      | 0   | 0                                                      | 0   | 5                              | 2   | 0.85                               |
| Test positive COVID-19                                      | 71             | 15  | 26                            | 21  | 6                                                      | 13  | <5                                                     |     | 35                             | 12  | 0.15                               |

Frequency counts of less than 5 have been replaced with the notation <5 to reduce the potential to identify members of the study sample.

<sup>a</sup> Answer was yes to most recent vitamin D level within 1 year being deficient (<20 ng/mL); dose was stable or decreased after last visit. Vitamin D dose was rank-ordered as follows: calcitriol > 3000+ IU D3 > 2000 IU D3 > D2 > 1-1000 IU D3/multivitamin > no vitamin D.

<sup>b</sup>Answer was yes to most recent vitamin D level within 1 year being deficient (<20 ng/mL); dose was increased after last visit. Vitamin D dose was rank-ordered as follows: calcitriol > 3000+ IU D3 > 2000 IU D3 > D2 > 1-1000 IU D3/multivitamin > no vitamin D.

<sup>c</sup>Answer was no to most recent vitamin D level within 1 year being deficient (<20 ng/mL); dose was decreased after last visit. Vitamin D dose was rank-ordered as follows: calcitriol > 3000+ IU D3 > 2000 IU D3 > D2 > 1-1000 IU D3/multivitamin > no vitamin D.

<sup>d</sup>Answer was no to most recent vitamin D level within 1 year being deficient (<20 ng/mL); dose was stable or increased after last visit. Vitamin D dose was rank-ordered as follows: calcitriol > 3000+ IU D3 > 2000 IU D3 > D2 > 1-1000 IU D3/multivitamin > no vitamin D.

eTable 2. Bivariate analysis of most recent active vitamin D treatment 14 days before COVID-19 test order and COVID-19 test results, among patients with most recent vitamin D in past year <20 ng/ml

| Most recent active vitamin D treatment prior to COVID-19 test order | Total patients | COVID-19 positive |    | COVID-19 negative |    |
|---------------------------------------------------------------------|----------------|-------------------|----|-------------------|----|
|                                                                     |                | N                 | %  | N                 | %  |
| No Vitamin D                                                        | 80             | 14                | 18 | 66                | 83 |
| 1-1000 IU D3/Multivitamin                                           | 28             | 7                 | 25 | 21                | 75 |
| 2000 IU D3                                                          | 7              | <5                |    | 6                 |    |
| 3000+ IU D3                                                         | 10             | <5                |    | 8                 |    |
| D2                                                                  | 44             | 7                 | 16 | 37                | 84 |
| Calcitriol                                                          | <5             | <5                |    | <5                |    |
| Total                                                               | 172            | 32                | 19 | 140               | 81 |
| Fisher's exact test p = 0.83                                        |                |                   |    |                   |    |

Frequency counts of less than 5 have been replaced with the notation <5 to reduce the potential to identify members of the study sample.

## eReference

1. Healthcare Cost and Utilization Project (HCUP). Elixhauser Comorbidity Software for ICD-10-CM (beta version). Version 2020 v1. Accessed April 8, 2020. [https://www.hcup-us.ahrq.gov/toolssoftware/comorbidityicd10/comorbidity\\_icd10.jsp](https://www.hcup-us.ahrq.gov/toolssoftware/comorbidityicd10/comorbidity_icd10.jsp)
